# Supplementary material for: Biomarkers in dementia: clinical utility and new directions
Source: PubMed Central journal article supplement — J Neurol Neurosurg Psychiatry. 2014 Sep 26;85(12):1426–34. doi: 10.1136/jnnp-2014-307662 (PMC4335455; doi:10.1136/jnnp-2014-307662), 2014-09-26
Supplement: jnnp-2014-307662-s1.pdf [file jnnp-2014-307662-s1.pdf]

**Supplementary Table .** Current and emerging biomarkers for differentiating dementia syndromes

| Biomarker                   | Specimen/modality          | Clinical use                                                                                                                | Current use in research                                                                                                                        |
|-----------------------------|----------------------------|-----------------------------------------------------------------------------------------------------------------------------|------------------------------------------------------------------------------------------------------------------------------------------------|
| <b>Alzheimer's disease</b>  |                            |                                                                                                                             |                                                                                                                                                |
| Current clinical biomarkers |                            |                                                                                                                             |                                                                                                                                                |
| Cell count                  | CSF                        | Unchanged in AD: useful to exclude neuroinfection                                                                           |                                                                                                                                                |
| CSF:serum albumin ratio     | CSF/blood (paired samples) | Unchanged in AD: increased when integrity of blood brain barrier is compromised (vascular/neuroinfection/neuroinflammation) |                                                                                                                                                |
| A $\beta$ 1-42              | CSF                        | Reduced in AD                                                                                                               |                                                                                                                                                |
| t-tau                       | CSF                        | Increased in AD (non-specific marker of neuronal damage/death)                                                              |                                                                                                                                                |
| p-tau                       | CSF                        | Increased in AD (specific marker of AD)                                                                                     |                                                                                                                                                |
|                             | Structural MRI             | Hippocampal and whole brain atrophy predates symptom onset                                                                  |                                                                                                                                                |
|                             | Amyloid PET                | Radioisotope marker of amyloid deposition. Several ligands available<br>International guidelines available for clinical use |                                                                                                                                                |
| Future/ emerging biomarkers |                            |                                                                                                                             |                                                                                                                                                |
| BACE-1                      | CSF                        |                                                                                                                             | $\beta$ secretase enzyme involved in cleaving amyloid precursor protein; may be elevated in earliest stages of AD                              |
| sAPP $\alpha$ /sAPP $\beta$ | CSF                        |                                                                                                                             | Marker of amyloid precursor protein metabolism – Not useful diagnostically but may be used to monitor response to treatment in clinical trials |
| A $\beta$ isoforms          | CSF                        |                                                                                                                             | Markers of amyloid metabolism but require mass spectrometric techniques not suitable for clinical routine work at present                      |
| Neurofilament               | CSF                        |                                                                                                                             | Marker of axonal damage; may reflect subcortical/white matter damage across a                                                                  |

|                                |                |                                                                                                                                                                                                                |                                                                                                                                              |
|--------------------------------|----------------|----------------------------------------------------------------------------------------------------------------------------------------------------------------------------------------------------------------|----------------------------------------------------------------------------------------------------------------------------------------------|
|                                |                |                                                                                                                                                                                                                | range of neurodegenerative/neuroinflammatory and infectious diseases including AD; can be normal in pure AD                                  |
| F <sub>2</sub> -Isoprostanes   | CSF            |                                                                                                                                                                                                                | Marker of oxidative stress/<br>neuroinflammation elevated in AD                                                                              |
| YKL-40                         | CSF, Plasma    |                                                                                                                                                                                                                | Marker of neuroinflammation                                                                                                                  |
| VLP-1                          | CSF            |                                                                                                                                                                                                                | Marker of neuronal injury                                                                                                                    |
| Neurogranin                    | CSF            |                                                                                                                                                                                                                | Marker of synaptic degeneration                                                                                                              |
| <b>Frontotemporal dementia</b> |                |                                                                                                                                                                                                                |                                                                                                                                              |
| Current clinical biomarkers    |                |                                                                                                                                                                                                                |                                                                                                                                              |
| A $\beta$ 1-42                 | CSF            | A $\beta$ 1-42 normal in non-AD dementia.<br>A $\beta$ 1-42:tau ratio used to exclude diagnosis of AD                                                                                                          |                                                                                                                                              |
| t-tau                          | CSF            | Often increased tau levels compared to normal controls;<br>typically lower than in AD                                                                                                                          |                                                                                                                                              |
|                                | Structural MRI | Specific structural patterns associated with clinical phenotypes                                                                                                                                               | Associations developing between genetic mutations, pathology and imaging structural changes.<br>Possible development prior to disease onset. |
|                                | PET            | FDG PET used in early disease duration cases to demonstrate hypometabolism in frontal/ temporal lobes when structural imaging is normal.<br>Amyloid binding ligands can differentiate AD from non-AD pathology | FDG/Amyloid PET may be useful in presymptomatic diagnosis<br><br>tau binding ligands – currently under investigation                         |
| Future/ emerging biomarkers    |                |                                                                                                                                                                                                                |                                                                                                                                              |
| t-tau and p-tau                | CSF            | t-tau may be normal or elevated<br>p-tau typically normal in FTD; elevated in AD                                                                                                                               | Decreased p-tau to t-tau ratio suggestive of TDP-43 pathology.                                                                               |
| TDP-43                         | Plasma/ CSF    |                                                                                                                                                                                                                | Increased levels found in plasma and CSF in FTD and MND.                                                                                     |
| Phosphorylated TDP-43          | Plasma/ CSF    |                                                                                                                                                                                                                | Increased levels in <i>C9ORF72</i> repeat expansion and <i>progranulin</i> mutation patients                                                 |
| Progranulin                    | serum          |                                                                                                                                                                                                                | Low levels in serum of patients with <i>progranulin</i> mutation                                                                             |

|                                                                     |                |                                                                                                             |                                                                                                                                                    |
|---------------------------------------------------------------------|----------------|-------------------------------------------------------------------------------------------------------------|----------------------------------------------------------------------------------------------------------------------------------------------------|
| Neurofilament light                                                 | CSF            |                                                                                                             | Marker of axonal damage: increased levels found to correlate with disease severity and in TDP-43 cases                                             |
| Inflammatory biomarkers<br>TNF-alpha, TNK-beta, IL-15, IL-17, IL-23 | CSF            |                                                                                                             | Possible marker of underlying inflammatory process. Not specific to FTD given possible role of inflammation in other neurodegenerative conditions. |
|                                                                     | DTI MRI        |                                                                                                             | White matter damage may differentiate tau from TDP-43 pathology                                                                                    |
|                                                                     | Functional MRI |                                                                                                             | Patterns of change in default and salience networks may differ between AD and FTD and between FTD subtypes.                                        |
| <b>Dementia with Lewy bodies</b>                                    |                |                                                                                                             |                                                                                                                                                    |
| Current clinical biomarkers                                         |                |                                                                                                             |                                                                                                                                                    |
|                                                                     | MRI            | Global atrophy with relative hippocampal sparing has some (albeit imperfect) predictive value for DLB vs AD | Possible reduced volume of putamen in DLB compared to AD                                                                                           |
|                                                                     | SPECT/PET      | PET and SPECT imaging showing striatal dopamine loss. FDG PET showing parieto-occipital hypoperfusion       | Ongoing research into use of cholinergic markers. Amyloid imaging not useful in differentiating DLB from AD                                        |
| Tau                                                                 | CSF            |                                                                                                             | Variable levels of tau, typically lower than AD, but in rapid cases can be elevated                                                                |
| Aβ1-42                                                              | CSF            |                                                                                                             | Aβ1-42 levels similar to AD.                                                                                                                       |
| Future/ emerging biomarkers                                         |                |                                                                                                             |                                                                                                                                                    |
| Alpha-synuclein                                                     | CSF            |                                                                                                             | Contrasting results found in DLB. Both reduced levels and no change.                                                                               |
